# Supplementary material for: Strain-induced electrostatic enhancements of BiFeO3nanowire loops
Source: Royal Society of Chemistry journal article supplement (doi:10.1039/c6cp03068h), 2016-01-01
Supplement: c6cp03068h1.pdf [file c6cp03068h1.pdf]

## Supplementary Information

# Strain-induced Electrostatic Enhancements of BiFeO<sub>3</sub> Nanowire Loops

*Jun Liu, Kovur Prashanthi, Zhi Li, Ryan T. McGee, Kaveh Ahadi and Thomas Thundat*

### 1. Electrospinning fabrication of BiFeO<sub>3</sub> nanowires

The synthesis of BFO nanowires by electrospinning method has been well-developed in our previous studies<sup>1-3</sup>. In a typical process, the BFO sol-gel precursor solution was prepared by dissolving 4 g Bi(NO<sub>3</sub>)<sub>3</sub>·5H<sub>2</sub>O and 3 g Fe(NO<sub>3</sub>)<sub>3</sub>·9H<sub>2</sub>O salts in 10 mL 2-methoxyethanol. The pH value of the solution was adjusted to 4 by adding ethanolamine. This mixture was magnetically stirred for 2 hours at room temperature. The polymer solution of 15 wt% was prepared by dissolving nylon-6 crystals to formic acid. The prepared BFO solution was added to this polymer solution drop by drop to obtain a homogeneous BFO precursor solution for the electrospinning process. A home-made electrospinning unit was used for the fabrication of BFO NWs. The obtained nylon-6/BFO gel was electrospun onto the Pt/Ti/SiO<sub>2</sub>/Si substrates with an applied voltage of 20 kV and feeding rate of 0.3 ml/h. The distance between the needle tip and the target was kept at 20 cm. The as-spun fibers were then dried at 100 °C for 2 h in a vacuum oven. The dried fibers were then calcinated at 600 °C in furnace for 2 h in presence of air to form BFO NWs. The product shows R3C Rhombohedral structure with XRD patterns matching JCPDS number 01-071-2494.

### 2. SEM characterization

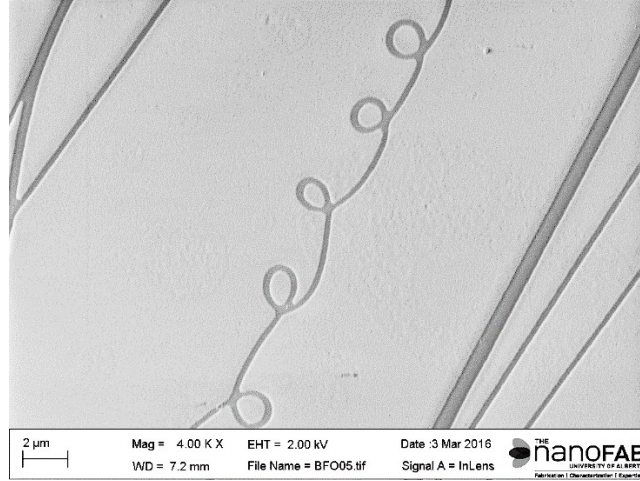

Fig. S1 SEM image of the as-prepared BFO nanowires.

### 3. Peakforce-KPFM (PF-KPFM) working principle

Peakforce-KPFM technique combines the PeakForce Tapping™ and frequency modulation KPFM (FM-KPFM), which offers simultaneous quantitative nanomechanical property and surface potential (*e.g.* contact potential difference  $V_{CPD}$ ) mapping capability. During the KPFM lift scan, external DC and AC bias,  $V_{DC}$  and  $V_{AC}$  are applied simultaneously between the tip and sample, of which  $V_{AC}$  at frequency  $\omega$  gives rise to an electric force modulation at both  $\omega$  and  $2\omega$ . Accordingly, the electric force gradient  $F'_{el}$  can be expressed as:

$$F'_{el} = \frac{\partial^2 C}{\partial z^2} \left( (V_{DC} - V_{CPD})^2 + \frac{1}{2} V_{AC}^2 \right) + \frac{\partial^2 C}{\partial z^2} (V_{DC} - V_{CPD}) V_{AC} \sin(\omega t) + \frac{1}{4} \frac{\partial^2 C}{\partial z^2} V_{AC}^2 \cos(2\omega t)$$

where  $\frac{\partial^2 C}{\partial z^2}$  is the second derivative of the capacitance,  $V_{CPD}$  is the KPFM surface potential signal, or the so-called contact potential difference. The  $V_{CPD}$  can be expressed as:

$$V_{CPD} = \frac{\varphi_{tip} - \varphi_{BFO}}{q},$$

where  $\varphi_{tip}$  and  $\varphi_{BFO}$  is the work function of AFM tip and BFO nanowire surface,  $q$  is the elementary charge, respectively. When  $V_{DC} = V_{CPD}$ , the modulation amplitude of the electric force gradient  $F'_{el}$  at  $\omega$  drops to 0, enabling one to extract work function information from  $V_{DC}$ . Herein,  $V_{CPD}$  instead of  $\varphi_{BFO}$  is used for interpretation, since tip work function calibration is very sensitive to the atmosphere, which would lose its validity when working in an ambient environment.

## References

1. Prashanthi, K.; Thundat, T. *Scanning* **2013**, 36, (2), 224-230.
2. Prashanthi, K.; Dhandharia, P.; Miriyala, N.; Gaikwad, R.; Barlage, D.; Thundat, T. *Nano Energy* **2015**, 13, 240–248.
3. Kovur, P.; Ravi, G.; Thomas, T. *Nanotechnology* **2013**, 24, (50), 505710-505710.
